# Supplementary material for: How to Estimate Optimal Malaria Readiness Indicators at Health-District Level: Findings from the Burkina Faso Service Availability and Readiness Assessment (SARA) Data
Source: MDPI journal article supplement (doi:10.3390/ijerph17113923), 2020-06-01
Supplement: s1 [file s1]

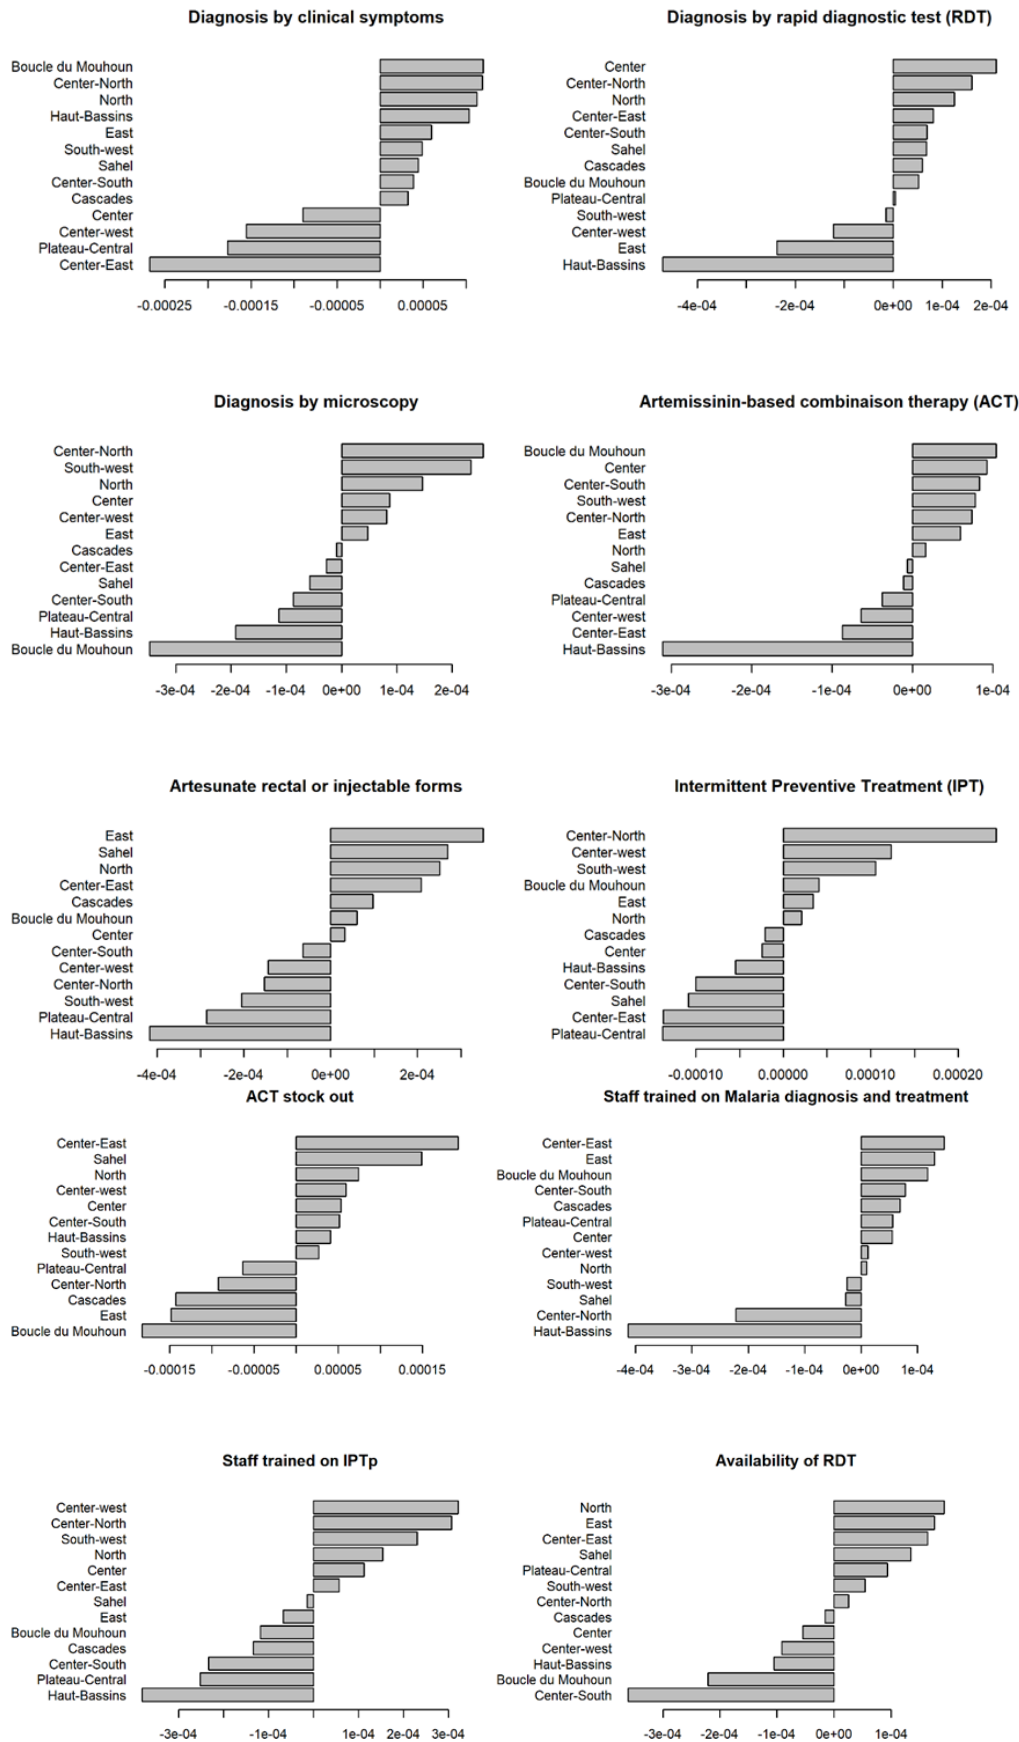

**Figure S1.** Regional variability for malaria readiness indicators throughout the study area.

**Table S1.** Geographical distribution of the availability of essential equipment at the health district level: posterior means of fitted values.

| Region            | Health District | Basic Equipment Availability, % (95% Credible Interval, CrI) |                       |                  |                  |                  |                  |                  |
|-------------------|-----------------|--------------------------------------------------------------|-----------------------|------------------|------------------|------------------|------------------|------------------|
|                   |                 | Adult weighing scale                                         | Infant weighing scale | Stethoscope      | Latex gloves     | Thermometer      | Tensiometer      | Light source     |
| Boucle Du Mouhoun | Boromo          | 95.8 (93.6–97.5)                                             | 82.3 (64.5–93.4)      | 98.9 (97.8–99.6) | 72.6 (48.8–89.9) | 99.8 (99.4–100)  | 94.2 (91.8–96.2) | 37.0 (15.8–60.8) |
|                   | Dedougou        | 96.0 (94.1–97.6)                                             | 83.5 (67.3–93.7)      | 98.8 (97.7–99.5) | 74.4 (53.6–89.2) | 99.7 (99.1–100)  | 95.3 (93.4–97.0) | 53.6 (31.3–75.2) |
|                   | Nouna           | 96.2 (93.7–98.0)                                             | 89.9 (78.9–97.4)      | 98.4 (96.8–99.4) | 73.0 (52.4–89.0) | 99.4 (98.4–99.9) | 95.8 (93.6–97.6) | 55.5 (34.6–75.5) |
|                   | Solenzo         | 96.0 (93.9–97.6)                                             | 89.6 (77.9–97.3)      | 98.8 (97.7–99.5) | 91.2 (75.7–99.0) | 99.7 (99.2–100)  | 95.0 (92.9–96.8) | 62.1 (39.0–82.8) |
|                   | Toma            | 95.8 (93.5–97.5)                                             | 88.9 (76.1–97.2)      | 98.9 (97.9–99.6) | 90.6 (75.2–98.5) | 99.8 (99.4–100)  | 94.3 (91.9–96.2) | 73.9 (49.4–92.5) |
|                   | Tougan          | 96.0 (93.9–97.7)                                             | 83.6 (67.3–93.8)      | 98.7 (97.5–99.5) | 82.4 (63.7–94.4) | 99.6 (99–99.9)   | 95.6 (93.6–97.3) | 23.3 (07.2–44.7) |
| Cascades          | Banfora         | 96.1 (94.2–97.7)                                             | 61.3 (41.2–79.3)      | 98.7 (97.6–99.5) | 96.0 (86.9–99.7) | 99.7 (99.2–100)  | 93.4 (90.7–95.6) | 38.1 (18.5–59.8) |
|                   | Mangodara       | 95.4 (91.8–97.9)                                             | 56.8 (27.7–80.9)      | 99.1 (97.7–99.8) | 88.0 (65.1–98.4) | 99.9 (99.6–100)  | 92.2 (88.2–95.4) | 30.0 (06.4–62.1) |
|                   | Sindou          | 96.0 (93.7–97.8)                                             | 66.8 (44.9–85.4)      | 98.9 (97.7–99.6) | 96.2 (83.7–99.9) | 99.8 (99.3–100)  | 94.6 (92.0–96.6) | 48.8 (24.5–73.5) |
| Center            | Baskuy          | 95.5 (90.4–98.6)                                             | 46.7 (31.1–61.9)      | 96.2 (91.2–99.0) | 87.6 (75.5–95.8) | 98.2 (94.6–99.8) | 43.8 (33.0–55.0) | 84.0 (70.9–93.5) |
|                   | Bogodogo        | 96.1 (94.0–97.8)                                             | 62.6 (45.4–77.2)      | 97.8 (96.3–98.9) | 93.7 (85.8–98.4) | 99.1 (98.0–99.7) | 80.4 (75.5–84.7) | 65.3 (48.3–80.3) |
|                   | Boulmiougou     | 96.1 (91.3–98.9)                                             | 63.7 (49.7–77.2)      | 93.9 (86.6–98.3) | 85.5 (74.0–93.9) | 91.5 (82.0–97.5) | 58.3 (46.1–69.9) | 75.6 (61.8–87.0) |
|                   | Nongr-Massoum   | 95.7 (91.7–98.4)                                             | 64.7 (49.6–79.3)      | 96.7 (93.1–98.9) | 91.6 (81.3–97.8) | 98.5 (95.9–99.7) | 54.6 (45.2–63.9) | 91.4 (80.5–98.0) |
|                   | Sig-Nonghin     | 95.7 (93.0–97.8)                                             | 77.0 (61.5–90.0)      | 98.2 (96.5–99.4) | 92.7 (81.1–98.6) | 99.6 (98.7–100)  | 77.3 (70.9–83.1) | 80.2 (62.9–92.9) |
|                   | Center-east     | Bittou                                                       | 95.0 (90.0–98.0)      | 92.2 (78.3–98.7) | 99.1 (97.5–99.9) | 97.4 (86.7–100)  | 99.9 (99.6–100)  | 91.0 (85.3–95.1) |
| Garango           |                 | 95.7 (93.4–97.5)                                             | 90.9 (77.3–98.0)      | 98.9 (97.8–99.6) | 96.9 (88.4–99.8) | 99.8 (99.4–100)  | 93.1 (90.2–95.4) | 87.1 (67.6–97.9) |
| Koupela           |                 | 95.9 (94.1–97.4)                                             | 92.4 (81.5–98.4)      | 98.8 (97.7–99.5) | 98.1 (93.2–99.9) | 99.7 (99.2–100)  | 92.3 (89.6–94.6) | 80.2 (59.4–94.2) |
| Ouargaye          |                 | 95.8 (93.7–97.5)                                             | 91.3 (78.7–98.0)      | 98.9 (97.8–99.6) | 98.1 (91.9–99.9) | 99.8 (99.3–100)  | 93.7 (91.0–95.8) | 55.0 (29.0–78.6) |
| Pouytenga         |                 | 95.4 (92.4–97.7)                                             | 92.6 (80.9–98.6)      | 99.0 (97.7–99.7) | 98.1 (92.0–99.9) | 99.9 (99.5–100)  | 92.1 (88.4–95.0) | 86.6 (65.9–97.8) |
| Tenkodogo         |                 | 95.5 (92.8–97.6)                                             | 92.9 (81.7–98.7)      | 99.0 (97.8–99.7) | 97.7 (92.0–99.8) | 99.9 (99.5–100)  | 93.3 (90.3–95.7) | 73.8 (47.4–92.3) |
| Zabre             |                 | 95.2 (90.9–97.9)                                             | 92.3 (79.3–98.7)      | 99.1 (97.6–99.8) | 96.3 (84.4–99.8) | 99.9 (99.6–100)  | 91.6 (86.7–95.2) | 83.6 (57.5–97.6) |
| Center-north      | Barsalogo       | 95.3 (91.5–97.8)                                             | 85.9 (67.2–97.1)      | 99.1 (97.7–99.8) | 96.7 (86.2–99.9) | 99.9 (99.6–100)  | 92.3 (88.2–95.4) | 69.9 (35.8–92.9) |
|                   | Boulsa          | 96.0 (94.0–97.6)                                             | 87.1 (73.8–96.2)      | 98.8 (97.7–99.5) | 97.9 (92.8–99.8) | 99.7 (99.1–100)  | 95.3 (93.3–97.0) | 83.1 (64.8–95.2) |
|                   | Boussouma       | 94.6 (88.1–98.2)                                             | 83.5 (56.9–97.2)      | 99.2 (97.3–99.9) | 96.1 (78.5–99.9) | 99.9 (99.7–100)  | 89.6 (82.0–94.8) | 80.1 (36.2–98.2) |
|                   | Kaya            | 96.2 (93.1–98.3)                                             | 75.0 (56.7–88.8)      | 97.8 (95.4–99.3) | 96.4 (89.8–99.5) | 98.6 (96.7–99.7) | 95.6 (92.7–97.6) | 92.4 (80.6–98.7) |
|                   | Kongoussi       | 96.0 (94.1–97.5)                                             | 88.0 (74.4–97.1)      | 98.8 (97.7–99.5) | 96.2 (88.4–99.6) | 99.7 (99.2–100)  | 94.5 (92.4–96.4) | 90.2 (74.8–98.4) |
|                   | Tougouri        | 94.6 (88.2–98.2)                                             | 83.6 (57.3–97.2)      | 99.2 (97.3–99.9) | 97.7 (89.6–99.9) | 99.9 (99.7–100)  | 89.6 (82.2–94.8) | 80.1 (36.3–98.2) |
| Center-west       | Koudougou       | 96.3 (91.7–98.9)                                             | 83.3 (70.3–93.2)      | 96.4 (90.7–99.3) | 90.4 (79.1–97.5) | 95.1 (86.6–99.2) | 95.1 (90.8–97.9) | 69.3 (52.6–83.8) |
|                   | Leo             | 96.0 (94.0–97.6)                                             | 85.4 (71.2–95.2)      | 98.8 (97.7–99.5) | 91.8 (78.9–98.6) | 99.7 (99.1–100)  | 95.3 (93.3–97.0) | 59.1 (35.9–80.2) |
|                   | Nanoro          | 95.6 (93.0–97.6)                                             | 76.0 (51.9–91.2)      | 99.0 (97.8–99.7) | 75.5 (46.6–93.8) | 99.9 (99.4–100)  | 92.7 (89.6–95.3) | 59.9 (32.2–84.1) |
|                   | Reo             | 96.0 (93.9–97.7)                                             | 81.6 (65.2–92.6)      | 98.7 (97.5–99.5) | 88.9 (74.8–97.2) | 99.6 (99.0–99.9) | 95.7 (93.7–97.3) | 63.1 (41.2–82.4) |
|                   | Sabou           | 94.7 (88.3–98.2)                                             | 81.6 (53.3–96.4)      | 99.2 (97.3–99.9) | 91.9 (66.2–99.6) | 99.9 (99.7–100)  | 89.6 (82.2–94.8) | 62.9 (17.7–94.8) |

| Region          | Health District  | Basic Equipment Availability, % (95% Credible Interval, CrI) |                       |                  |                  |                  |                  |                  |
|-----------------|------------------|--------------------------------------------------------------|-----------------------|------------------|------------------|------------------|------------------|------------------|
|                 |                  | Adult weighing scale                                         | Infant weighing scale | Stethoscope      | Latex gloves     | Thermometer      | Tensiometer      | Light source     |
| Center-south    | Sapouy           | 95.6 (93.2–97.5)                                             | 83.2 (65.1–94.8)      | 99.0 (97.8–99.7) | 89.9 (72.5–98.2) | 99.8 (99.4–100)  | 93.8 (91.1–95.9) | 59.2 (31.6–83.6) |
|                 | Tenado           | 94.7 (88.3–98.2)                                             | 81.5 (53.2–96.4)      | 99.2 (97.3–99.9) | 89.6 (61.4–99.3) | 99.9 (99.7–100)  | 89.6 (82.3–94.8) | 62.9 (17.7–94.8) |
|                 | Kombissiri       | 95.3 (91.5–97.8)                                             | 57.4 (33.7–80.0)      | 99.1 (97.7–99.8) | 91.0 (73.7–98.7) | 99.9 (99.6–100)  | 92.2 (88.1–95.3) | 36.0 (12.7–64.0) |
|                 | Manga            | 96.0 (93.9–97.7)                                             | 53.3 (32.2–73.1)      | 98.7 (97.5–99.5) | 88.6 (72.5–97.1) | 99.6 (99.0–99.9) | 95.6 (93.6–97.2) | 44.8 (23.1–67.9) |
|                 | Po               | 95.4 (92.2–97.7)                                             | 53.3 (29.3–75.9)      | 99.1 (97.7–99.8) | 94.5 (81.3–99.6) | 99.9 (99.5–100)  | 92.7 (89.2–95.5) | 28.8 (08.2–55.9) |
| East            | Sapone           | 95.6 (93.2–97.5)                                             | 57.7 (34.2–79.9)      | 99.0 (97.8–99.7) | 89.7 (71.7–98.2) | 99.8 (99.4–100)  | 93.8 (91.1–95.9) | 28.5 (08.2–55.5) |
|                 | Bogande          | 95.8 (93.7–97.5)                                             | 85.3 (69.8–96.2)      | 98.9 (97.8–99.6) | 98.4 (94.3–99.9) | 99.8 (99.3–100)  | 93.6 (91.2–95.7) | 48.7 (22.9–73.9) |
|                 | Diapaga          | 96.0 (94.0–97.6)                                             | 80.9 (64.3–93.0)      | 98.6 (97.5–99.4) | 98.2 (91.6–100)  | 99.6 (98.9–99.9) | 94.3 (91.7–96.3) | 87.1 (69.5–97.6) |
|                 | Fada N'gourma    | 96.0 (94.1–97.5)                                             | 71.3 (50.3–86.7)      | 98.7 (97.7–99.4) | 98.5 (94.4–99.9) | 99.7 (99.1–99.9) | 94.0 (91.6–95.9) | 66.3 (44.5–84.8) |
|                 | Gayeri           | 95.2 (91.4–97.8)                                             | 84.1 (66.2–96.1)      | 99.1 (97.7–99.8) | 98.6 (93.2–100)  | 99.9 (99.6–100)  | 92.2 (88.1–95.4) | 81.3 (55.3–96.8) |
|                 | Mani             | 95.3 (91.5–97.8)                                             | 83.7 (65.0–96.0)      | 99.1 (97.7–99.8) | 98.1 (91.9–99.9) | 99.9 (99.6–100)  | 92.2 (88.1–95.3) | 62.1 (29.6–88.1) |
|                 | Pama             | 95.0 (90.0–98.0)                                             | 77.9 (55.8–92.6)      | 99.2 (97.5–99.9) | 98.6 (92.3–100)  | 99.9 (99.6–100)  | 91.0 (85.3–95.1) | 75.8 (48.8–94.2) |
|                 | Dafra            | 95.6 (92.1–98.1)                                             | 54.2 (34.2–72.2)      | 98.3 (96.2–99.5) | 85.4 (68.7–95.9) | 99.7 (98.8–100)  | 74.2 (65.2–82.0) | 77.4 (59.1–91.2) |
| Hauts-Bassins   | Dande            | 96.0 (94.0–97.6)                                             | 82.4 (66.6–94.1)      | 98.8 (97.7–99.5) | 85.4 (66.6–96.4) | 99.7 (99.2–100)  | 95.0 (92.9–96.7) | 57.7 (33.7–79.6) |
|                 | Do               | 95.9 (93.2–98.0)                                             | 65.4 (48.8–80.7)      | 98.1 (96.2–99.3) | 94.7 (86.1–99.1) | 99.5 (98.5–99.9) | 75.4 (68.4–81.5) | 80.4 (64.4–92.4) |
|                 | Hounde           | 95.8 (93.6–97.6)                                             | 75.1 (54.4–89.5)      | 98.9 (97.8–99.6) | 80.7 (59.5–94.3) | 99.8 (99.4–100)  | 94.2 (91.9–96.2) | 58.8 (33.3–81.7) |
|                 | Karangasso–Vigue | 95.2 (91.1–98.0)                                             | 80.5 (59.7–94.8)      | 99.1 (97.6–99.8) | 90.8 (72.4–98.9) | 99.9 (99.6–100)  | 91.6 (87.0–95.1) | 65.1 (31.5–90.9) |
|                 | Lena             | 95.4 (91.7–97.9)                                             | 73.6 (48.0–90.2)      | 99.1 (97.7–99.8) | 90.1 (71.7–98.6) | 99.9 (99.6–100)  | 92.2 (88.3–95.3) | 77.0 (47.9–95.8) |
|                 | N'dorola         | 94.8 (88.4–98.3)                                             | 77.9 (50.2–94.7)      | 99.2 (97.2–99.9) | 92.5 (63.3–99.8) | 99.9 (99.7–100)  | 89.5 (82.0–94.8) | 65.1 (20.8–94.9) |
|                 | Orodara          | 96.2 (93.7–98.1)                                             | 84.3 (69.9–94.9)      | 98.4 (96.9–99.4) | 93.5 (81.3–99.1) | 99.4 (98.5–99.9) | 96.2 (93.9–97.8) | 57.9 (36.7–77.5) |
|                 | Gourcy           | 95.8 (93.6–97.5)                                             | 54.8 (34.2–76.3)      | 98.9 (97.8–99.6) | 80.4 (57.2–94.7) | 99.8 (99.3–100)  | 94.6 (92.4–96.5) | 25.1 (06.4–50.3) |
| North           | Ouahigouya       | 96.1 (94.0–97.7)                                             | 49.6 (32.6–67.2)      | 98.5 (97.3–99.4) | 94.7 (85.4–99.3) | 99.5 (98.8–99.9) | 94.7 (92.3–96.6) | 75.8 (58.1–89.8) |
|                 | Seguenega        | 95.8 (93.7–97.5)                                             | 45.6 (24.2–66.7)      | 98.9 (97.8–99.6) | 94.8 (83.9–99.5) | 99.8 (99.3–100)  | 94.6 (92.4–96.5) | 82.8 (61.1–96.6) |
|                 | Thiou            | 94.6 (88.1–98.2)                                             | 51.5 (20.5–84.2)      | 99.2 (97.3–99.9) | 92.9 (64.0–99.8) | 99.9 (99.7–100)  | 89.6 (82.0–94.9) | 64.7 (19.3–95.1) |
|                 | Titao            | 95.6 (92.9–97.6)                                             | 54.1 (32.2–77.4)      | 99 (97.8–99.7.0) | 95.9 (86.1–99.7) | 99.9 (99.4–100)  | 92.7 (89.6–95.3) | 63.5 (37.0–85.9) |
|                 | Yako             | 96.1 (93.6–97.9)                                             | 37.9 (19.3–56.8)      | 98.4 (96.9–99.4) | 89.2 (77.2–96.5) | 99.4 (98.4–99.9) | 95.8 (93.6–97.5) | 68.4 (48.4–85.4) |
| Plateau Central | Bousse           | 95.7 (93.4–97.5)                                             | 85.8 (67.5–96.2)      | 98.9 (97.8–99.6) | 89.8 (73.6–97.9) | 99.8 (99.4–100)  | 93.1 (90.4–95.4) | 86.7 (67.0–97.8) |
|                 | Ziniare          | 96.1 (93.4–98.1)                                             | 91.9 (81.2–98.2)      | 98.4 (96.7–99.4) | 93.0 (82.5–98.5) | 99.3 (98.2–99.9) | 96.4 (94.3–98.0) | 69.8 (49.2–86.8) |
|                 | Zorgho           | 96.2 (92.8–98.4)                                             | 90.4 (79.0–97.4)      | 97.9 (95.4–99.4) | 96.1 (89.4–99.4) | 98.7 (96.7–99.8) | 96.5 (94.1–98.3) | 77.1 (59.0–90.9) |
| Sahel           | Djibo            | 96.1 (93.9–97.8)                                             | 84.1 (67.2–95.0)      | 98.4 (97.1–99.3) | 92.8 (80.2–98.7) | 99.4 (98.5–99.9) | 95.0 (92.6–97.0) | 85.0 (67.3–96.3) |
|                 | Dori             | 95.4 (92.1–97.7)                                             | 89.1 (73.7–97.9)      | 99.1 (97.8–99.8) | 97.6 (90.2–99.9) | 99.9 (99.5–100)  | 92.8 (89.3–95.6) | 62.2 (32.1–86.8) |
|                 | Gorom–Gorom      | 95.5 (92.5–97.7)                                             | 89.4 (74.6–97.9)      | 99.0 (97.8–99.7) | 96.2 (82.3–99.9) | 99.9 (99.5–100)  | 93.3 (90.0–95.9) | 72.0 (44.9–91.7) |
| South west      | Sebba            | 95.3 (91.5–97.8)                                             | 88.8 (72.5–97.9)      | 99.1 (97.7–99.8) | 98.2 (91.8–100)  | 99.9 (99.6–100)  | 92.2 (88.0–95.4) | 82.9 (57.3–97.3) |
|                 | Batie            | 95.3 (90.9–98.1)                                             | 74.5 (50.0–93.4)      | 99.1 (97.5–99.8) | 84.8 (52.9–99.1) | 99.9 (99.6–100)  | 91.7 (86.6–95.4) | 78.8 (49.5–96.6) |

| Region | Health District | Basic Equipment Availability, % (95% Credible Interval, CrI) |                       |                  |                  |                  |                  |                  |
|--------|-----------------|--------------------------------------------------------------|-----------------------|------------------|------------------|------------------|------------------|------------------|
|        |                 | Adult weighing scale                                         | Infant weighing scale | Stethoscope      | Latex gloves     | Thermometer      | Tensiometer      | Light source     |
|        | Dano            | 96.1 (94.2–97.6)                                             | 63.7 (41.9–81.9)      | 98.8 (97.7–99.5) | 80.3 (59.9–94.0) | 99.7 (99.1–100)  | 94.5 (92.3–96.4) | 59.4 (35.1–81.2) |
|        | Diebougou       | 95.6 (92.9–97.7)                                             | 73.7 (52.0–91.4)      | 99 (97.8–99.7.0) | 88.2 (70.1–98.0) | 99.9 (99.5–100)  | 93.3 (90.3–95.8) | 76.1 (50.4–94.0) |
|        | Gaoua           | 96.2 (94.1–97.9)                                             | 61.1 (39.8–79.2)      | 98.6 (97.3–99.4) | 54.2 (30.5–76.4) | 99.6 (98.9–99.9) | 95.2 (92.9–97.0) | 60.4 (38.0–80.4) |
|        | Kampti          | 94.8 (88.4–98.3)                                             | 69.2 (37.0–92.7)      | 99.2 (97.2–99.9) | 83.8 (42.8–99.1) | 99.9 (99.7–100)  | 89.6 (82.1–94.8) | 68.3 (22.7–96.1) |

**Table S2.** Geographical distribution of malaria readiness at the health district level: posterior means of fitted values.

| Region                   | Health District | Diagnostic       |                  |                  | Anti-Malaria Drugs |                      |                  |                  |
|--------------------------|-----------------|------------------|------------------|------------------|--------------------|----------------------|------------------|------------------|
|                          |                 | Symptom          | RDT              | Microscopy       | Oral ACT           | Rectal or injectable | ITP-SP           | ACT Out of Stock |
| <b>Boucle Du Mouhoun</b> | Boromo          | 98.9 (97.8–99.7) | 94.9 (92.1–97.1) | 13.6 (09.6–18.2) | 97.8 (94.2–99.7)   | 27.8 (10.6–49.2)     | 94.3 (91.3–96.6) | 04.6 (02.6–07.2) |
|                          | Dedougou        | 98.4 (97.1–99.4) | 95.3 (92.7–97.2) | 10.7 (07.4–14.5) | 98.6 (96.2–99.8)   | 44.3 (24.0–65.8)     | 95.6 (93.3–97.6) | 05.0 (03.0–07.5) |
|                          | Nouna           | 97.5 (95.4–98.9) | 95.2 (92.3–97.5) | 09.2 (05.9–13.2) | 99.0 (96.8–99.8)   | 59.5 (39.2–78.7)     | 96.2 (93.7–98.1) | 06.1 (03.4–09.5) |
|                          | Solenzo         | 98.6 (97.4–99.5) | 95.3 (92.7–97.4) | 11.7 (08.0–15.9) | 98.4 (95.6–99.8)   | 56.9 (34.9–78.1)     | 95.3 (92.7–97.4) | 04.8 (02.8–07.3) |
|                          | Toma            | 99.0 (97.8–99.7) | 95.1 (92.5–97.3) | 13.7 (09.7–18.3) | 97.7 (94.1–99.7)   | 31.2 (12.1–54.4)     | 94.2 (91.2–96.6) | 04.5 (02.5–07.0) |
| Cascades                 | Tougan          | 98.2 (96.7–99.2) | 95.4 (92.8–97.4) | 10.1 (06.9–14.0) | 98.8 (96.6–99.8)   | 35.0 (16.5–56.2)     | 95.9 (93.4–97.7) | 05.2 (03.1–08.0) |
|                          | Banfora         | 98.7 (97.5–99.5) | 94.2 (91.0–96.6) | 14.1 (09.9–18.9) | 96.5 (90.7–99.2)   | 18.2 (05.8–35.4)     | 93.4 (90.0–96.0) | 05.0 (02.9–07.6) |
|                          | Mangodara       | 99.4 (98.3–99.9) | 94.5 (90.6–97.3) | 18.5 (12.3–25.8) | 95.3 (87.8–99.4)   | 51.9 (23.5–80.6)     | 92.0 (87.1–95.7) | 03.9 (01.8–07.1) |
| Center                   | Sindou          | 98.8 (97.6–99.6) | 95.1 (92.1–97.4) | 12.6 (08.4–17.5) | 98.0 (94.7–99.7)   | 62.9 (39.1–84.3)     | 94.8 (91.8–97.2) | 04.6 (02.5–07.3) |
|                          | Baskuy          | 86.2 (72.5–95.6) | 50.2 (33.4–67.0) | 56.8 (39.9–73.1) | 39.2 (23.3–56.2)   | 20.1 (08.3–35.2)     | 59.3 (42.3–75.2) | 02.4 (00.0–14.9) |
|                          | Bogodogo        | 97.9 (96.0–99.2) | 85.2 (79.2–89.8) | 28.0 (21.6–35.1) | 68.0 (49.4–82.5)   | 17.1 (07.1–30.5)     | 78.4 (68.9–84.4) | 06.6 (03.8–10.0) |
|                          | Boulmiougou     | 94.4 (86.4–98.8) | 68.0 (54.9–79.7) | 42.4 (30.1–55.2) | 57.2 (41.1–72.7)   | 12.6 (04.9–23.5)     | 56.7 (43.3–69.7) | 12.4 (05.1–22.6) |
|                          | Nongr-Massoum   | 97.4 (94.0–99.3) | 69.7 (59.1–79.8) | 52.3 (41.9–63.0) | 31.2 (17.7–46.4)   | 12.8 (04.4–25.2)     | 55.3 (44.2–66.9) | 04.8 (01.6–09.4) |
| Center-east              | Sig-Nonghin     | 98.9 (97.3–99.7) | 85.0 (77.7–90.6) | 35.0 (26.7–44.2) | 70.5 (54.1–85.4)   | 26.3 (11.8–44.6)     | 75.4 (66.2–83.1) | 05.5 (02.8–09.4) |
|                          | Bittou          | 99.5 (98.3–99.9) | 94.3 (89.7–97.5) | 21.5 (13.6–31.1) | 93.4 (82.6–99.3)   | 59.6 (28.7–87.6)     | 90.4 (83.6–95.3) | 03.7 (01.5–07.4) |
|                          | Garango         | 99.0 (97.8–99.7) | 94.4 (91.3–96.8) | 15.6 (11.1–20.8) | 95.7 (88.4–99.1)   | 45.6 (22.4–70.4)     | 92.9 (89–95.7.0) | 04.4 (02.4–07.0) |
|                          | Koupela         | 98.8 (97.6–99.5) | 93.7 (90.5–96.1) | 16.2 (11.9–21.2) | 96.5 (91.4–99.4)   | 31.7 (13.5–53.7)     | 92.3 (88.8–95.2) | 05.2 (03.2–08.0) |
|                          | Ouargaye        | 98.8 (97.5–99.6) | 94.7 (91.9–97.1) | 14.4 (10.2–19.4) | 96.3 (90.0–99.2)   | 58.0 (34.7–80.2)     | 93.8 (90.6–96.4) | 04.7 (02.7–07.4) |
|                          | Pouytenga       | 99.2 (98.1–99.8) | 94.3 (90.8–97.0) | 18.1 (12.5–24.6) | 94.2 (85.1–98.8)   | 28.3 (09.3–52.8)     | 91.8 (87.2–95.3) | 04.1 (02.0–06.9) |
|                          | Tenkodogo       | 99.1 (98.0–99.8) | 94.9 (91.8–97.3) | 15.8 (10.9–21.3) | 96.8 (91.9–99.6)   | 56.8 (31.3–81.1)     | 93.3 (89.7–96.2) | 04.2 (02.2–07.0) |
| Center-north             | Zabre           | 99.4 (98.2–99.9) | 94.5 (90.3–97.4) | 20.2 (13.3–28.7) | 94.6 (85.9–99.3)   | 36.4 (12.2–65.6)     | 91.0 (85.1–95.3) | 03.8 (01.7–07.3) |
|                          | Barsalogo       | 99.4 (98.2–99.9) | 94.7 (90.9–97.4) | 18.7 (12.5–26.2) | 95.4 (88.1–99.4)   | 36.0 (12.0–64.9)     | 91.9 (87.1–95.8) | 04.0 (01.8–07.2) |
|                          | Boulsa          | 98.4 (97.0–99.4) | 95.4 (93.0–97.4) | 11.3 (07.9–15.5) | 98.6 (96.2–99.8)   | 16.8 (04.6–34.3)     | 95.6 (93.2–97.6) | 04.9 (02.9–07.5) |
|                          | Boussouma       | 99.6 (98.5–100)  | 94.0 (88.2–97.6) | 24.5 (14.7–36.6) | 90.2 (72.7–99.1)   | 41.1 (09.7–79.6)     | 88.5 (79.4–94.9) | 03.5 (01.2–07.5) |
|                          | Kaya            | 96.1 (92.6–98.4) | 94.4 (90.5–97.2) | 09.0 (05.5–13.6) | 98.9 (96.5–99.8)   | 46.5 (28.4–65.3)     | 96.0 (93.0–98.2) | 07.4 (03.9–12.1) |
|                          | Kongoussi       | 98.6 (97.3–99.4) | 95.0 (92.4–97.1) | 12.6 (09.1–17.0) | 98.1 (95.0–99.7)   | 46.3 (25.3–68.3)     | 94.8 (92.1–097)  | 05.0 (03.0–07.5) |
| Center-west              | Tougouri        | 99.6 (98.5–100)  | 94.0 (88.3–97.6) | 24.6 (14.8–36.5) | 90.2 (72.7–99.1)   | 41.5 (10.0–79.6)     | 88.5 (79.4–94.8) | 03.5 (01.2–07.6) |
|                          | Koudougou       | 92.2 (83.1–97.7) | 92.6 (85.9–96.9) | 08.8 (04.6–14.7) | 97.6 (91.3–99.7)   | 19.5 (08.4–33.8)     | 95.6 (91.0–98.3) | 09.6 (04.2–17.6) |
|                          | Leo             | 98.4 (97.0–99.3) | 95.4 (92.9–97.4) | 10.9 (07.6–14.9) | 98.6 (96.1–99.8)   | 46.6 (25.5–68.6)     | 95.6 (93.2–97.6) | 05.2 (03.1–07.9) |
|                          | Nanoro          | 99.1 (98.0–99.8) | 94.3 (90.9–96.8) | 16.8 (11.8–22.6) | 96.3 (90.7–99.4)   | 27.7 (09.0–52.0)     | 92.6 (88.8–95.8) | 04.3 (02.3–07.0) |
|                          | Reo             | 98.1 (96.6–99.2) | 95.5 (92.9–97.5) | 10.1 (06.9–13.9) | 98.8 (96.6–99.8)   | 42.3 (22.8–63.3)     | 96.0 (93.7–97.8) | 05.2 (03.1–08.0) |
|                          | Sabou           | 99.6 (98.5–100)  | 93.9 (88.1–97.6) | 24.4 (14.7–36.3) | 90.2 (72.7–99.1)   | 40.6 (29.6–79.0)     | 88.6 (79.5–94.8) | 03.5 (01.2–07.5) |

| Region          | Health District  | Diagnostic       |                  |                  | Anti-Malaria Drugs |                      |                  |                  |
|-----------------|------------------|------------------|------------------|------------------|--------------------|----------------------|------------------|------------------|
|                 |                  | Symptom          | RDT              | Microscopy       | Oral ACT           | Rectal or injectable | ITP-SP           | ACT Out of Stock |
| Center-south    | Sapouy           | 99.1 (97.9–99.7) | 95.0 (92.2–97.3) | 14.8 (10.5–20.0) | 97.3 (93.0–99.6)   | 42.1 (18.9–67.7)     | 93.8 (90.6–96.5) | 04.4 (02.4–07.0) |
|                 | Tenado           | 99.6 (98.5–100)  | 93.9 (88.2–97.6) | 24.4 (14.8–36.2) | 90.1 (72.6–99.1)   | 40.3 (09.5–78.8)     | 88.5 (79.5–94.8) | 03.5 (01.2–07.6) |
|                 | Kombissiri       | 99.3 (98.2–99.9) | 94.6 (91.0–97.4) | 18.5 (12.4–25.6) | 95.5 (88.7–99.4)   | 28.7 (09.4–53.5)     | 91.8 (86.8–95.5) | 03.9 (01.8–07.0) |
|                 | Manga            | 98.2 (96.6–99.2) | 95.5 (93.0–97.5) | 10.1 (06.9–14.0) | 98.8 (96.6–99.8)   | 44.8 (24.4–66.3)     | 95.8 (93.4–97.7) | 05.3 (03.1–08.1) |
|                 | Po               | 99.3 (98.1–99.8) | 94.8 (91.4–97.3) | 17.2 (11.7–23.6) | 96.2 (90.5–99.5)   | 42.2 (18.9–68.0)     | 92.4 (88.1–95.8) | 04.1 (02.0–07.1) |
| East            | Sapone           | 99.1 (97.9–99.7) | 94.9 (91.9–97.1) | 14.8 (10.5–20.0) | 97.3 (93.0–99.6)   | 41.9 (18.8–67.6)     | 93.8 (90.6–96.5) | 04.4 (02.4–07.2) |
|                 | Bogande          | 98.9 (97.7–99.6) | 94.6 (91.7–96.8) | 14.7 (10.6–19.6) | 97.4 (93.2–99.6)   | 55.0 (31.3–78.2)     | 93.8 (90.7–96.4) | 04.7 (02.7–07.3) |
|                 | Diapaga          | 98.3 (96.8–99.2) | 94.3 (90.9–96.7) | 12.4 (08.6–17.1) | 98.1 (94.7–99.7)   | 66.8 (44.4–86.4)     | 94.3 (91.0–96.7) | 05.6 (03.3–08.5) |
|                 | Fada N'gourma    | 98.5 (97.2–99.4) | 94.4 (91.5–96.7) | 13.1 (09.3–17.4) | 97.8 (94.3–99.6)   | 42.0 (22.5–63.1)     | 94.2 (91.3–96.6) | 05.5 (03.4–08.2) |
|                 | Gayeri           | 99.3 (98.2–99.9) | 94.6 (90.8–97.4) | 18.6 (12.4–26.1) | 95.4 (88.2–99.4)   | 58.2 (30.3–84.2)     | 91.9 (87.0–95.7) | 04.0 (01.8–07.2) |
| Hauts-Bassins   | Mani             | 99.3 (98.2–99.9) | 94.5 (90.6–97.2) | 18.7 (12.5–26.1) | 95.4 (88.1–99.4)   | 28.1 (07.3–56.1)     | 91.7 (86.7–95.5) | 03.9 (01.8–07.1) |
|                 | Pama             | 99.5 (98.4–99.9) | 94.3 (89.7–97.5) | 21.3 (13.4–30.8) | 91.7 (79.4–98.5)   | 46.5 (20.9–73.6)     | 90.4 (83.7–95.4) | 03.8 (01.5–07.5) |
|                 | Dafra            | 99.2 (97.7–99.8) | 83.3 (73.1–90.6) | 38.5 (28.2–49.7) | 51.2 (32.2–69.0)   | 12.4 (03.4–26.4)     | 71.0 (59.1–81.2) | 05.9 (02.6–11.0) |
|                 | Dande            | 98.6 (97.4–99.5) | 95.2 (92.6–97.3) | 11.7 (08.1–15.8) | 97.6 (93.0–99.5)   | 32.9 (14.1–55.0)     | 95.3 (92.7–97.3) | 04.8 (02.8–07.4) |
|                 | Do               | 98.9 (97.3–99.7) | 83.7 (75.5–90.0) | 35.0 (25.9–44.5) | 50.3 (31.2–67.3)   | 25.2 (11.7–42.1)     | 71.8 (61.2–80.5) | 06.9 (03.2–12.3) |
|                 | Hounde           | 99.0 (97.8–99.7) | 94.9 (92.0–97.0) | 13.7 (09.7–18.3) | 97.7 (94.1–99.7)   | 42.5 (20.5–66.6)     | 94.4 (91.5–96.8) | 04.6 (02.6–07.2) |
|                 | Karangasso–Vigue | 99.4 (98.4–99.9) | 94.2 (89.8–97.2) | 19.9 (13.0–28.0) | 94.3 (85.2–99.3)   | 28.8 (07.1–58.5)     | 91.2 (85.7–95.5) | 03.8 (01.6–07.1) |
|                 | Lena             | 99.4 (98.3–99.9) | 94.5 (90.7–97.2) | 18.2 (12.1–25.3) | 95.3 (87.9–99.4)   | 34.7 (11.3–63.7)     | 92.0 (87.2–95.7) | 03.9 (01.8–07.1) |
|                 | N'dorola         | 99.6 (98.6–100)  | 93.8 (87.9–97.5) | 24.2 (14.4–36.2) | 89.9 (71.9–99.1)   | 39.3 (08.7–78.4)     | 88.5 (79.4–94.8) | 03.5 (01.2–07.6) |
|                 | Orodara          | 97.6 (95.5–99.0) | 95.5 (92.4–97.7) | 08.6 (05.3–12.7) | 99.1 (97.2–99.9)   | 18.6 (06.0–35.9)     | 96.6 (94.1–98.3) | 05.7 (03.1–09.2) |
| North           | Gourcy           | 98.8 (97.6–99.6) | 95.3 (92.7–97.4) | 12.7 (09.0–17.2) | 98.1 (95.0–99.7)   | 58.1 (34.8–80.1)     | 94.8 (92.1–97.1) | 04.6 (02.7–07.2) |
|                 | Ouahigouya       | 98.0 (96.5–99.1) | 94.8 (92.0–97.1) | 11.5 (08.0–15.9) | 98.4 (95.7–99.7)   | 50.6 (32.3–69.1)     | 94.9 (91.9–97.1) | 05.5 (03.3–08.3) |
|                 | Seguenega        | 98.8 (97.5–99.6) | 95.3 (92.7–97.3) | 12.8 (09.0–17.2) | 98.1 (94.9–99.7)   | 49.5 (26.4–73.2)     | 94.8 (92.2–97.1) | 04.7 (02.8–07.4) |
|                 | Thiou            | 99.6 (98.5–100)  | 94.0 (88.2–97.7) | 24.5 (14.6–36.7) | 90.2 (72.5–99.1)   | 41.4 (09.8–79.9)     | 88.5 (79.2–94.9) | 03.5 (01.2–07.6) |
|                 | Titao            | 99.1 (98.0–99.8) | 94.5 (91.4–97.1) | 16.8 (11.8–22.7) | 96.3 (90.8–99.4)   | 32.6 (12.6–56.8)     | 92.6 (88.8–95.8) | 04.4 (02.3–07.3) |
| Plateau Central | Yako             | 97.4 (95.4–98.9) | 95.0 (91.9–97.3) | 09.5 (06.2–13.6) | 98.5 (95.0–99.7)   | 45.0 (26.2–64.7)     | 96.1 (93.6–98.0) | 06.0 (03.4–09.3) |
|                 | Bousse           | 99.0 (97.9–99.7) | 94.6 (91.7–97.0) | 15.6 (11.2–20.7) | 95.8 (88.7–99.1)   | 19.6 (05.2–40.3)     | 92.9 (89.2–95.7) | 04.5 (02.5–07.1) |
|                 | Ziniare          | 97.1 (94.4–98.8) | 95.6 (92.6–97.7) | 08.1 (05.1–12.0) | 99.3 (97.6–99.9)   | 26.7 (11.3–45.7)     | 96.8 (94.5–98.5) | 06.1 (03.3–09.9) |
| Sahel           | Zorgho           | 95.6 (91.3–98.4) | 95.3 (91.7–97.8) | 07.4 (04.2–11.6) | 99.3 (97.7–99.9)   | 41.7 (23.9–60.9)     | 96.9 (94.2–98.7) | 06.8 (03.3–11.5) |
|                 | Djibo            | 97.7 (96.0–99.0) | 94.7 (91.6–97.0) | 10.7 (07.2–15.0) | 97.9 (93.4–99.6)   | 28.1 (11.8–48.1)     | 95.2 (92.1–97.4) | 06.3 (03.8–09.8) |
|                 | Dori             | 99.3 (98.1–99.8) | 94.8 (91.4–97.4) | 17.1 (11.5–23.5) | 96.2 (90.3–99.5)   | 53.3 (27.2–79.2)     | 92.6 (88.4–96.0) | 04.2 (02.1–07.3) |
|                 | Gorom-Gorom      | 99.2 (98.0–99.8) | 94.9 (91.7–97.4) | 16.0 (10.8–22.3) | 96.8 (91.8–99.6)   | 63.6 (37.6–86.5)     | 93.2 (89.4–96.3) | 04.3 (02.2–07.3) |
| South west      | Sebba            | 99.4 (98.2–99.9) | 94.6 (90.9–97.4) | 18.6 (12.4–26.0) | 95.4 (88.3–99.4)   | 57.8 (30.0–83.9)     | 91.7 (86.6–95.5) | 04.0 (01.8–07.2) |
|                 | Batie            | 99.4 (98.3–99.9) | 94.4 (89.9–97.4) | 20.0 (12.7–28.9) | 94.4 (85.4–99.3)   | 26.3 (06.3–54.5)     | 91.2 (85.3–95.7) | 03.8 (01.6–07.3) |

| Region | Health District | Diagnostic       |                  |                  | Anti-Malaria Drugs |                      |                  |                  |
|--------|-----------------|------------------|------------------|------------------|--------------------|----------------------|------------------|------------------|
|        |                 | Symptom          | RDT              | Microscopy       | Oral ACT           | Rectal or injectable | ITP-SP           | ACT Out of Stock |
|        | Dano            | 98.6 (97.3–99.4) | 94.6 (91.5–96.7) | 12.8 (09.1–17.3) | 98.1 (94.9–99.7)   | 42.7 (21.8–65.5)     | 94.8 (92.1–97.0) | 05.2 (03.2–08.0) |
|        | Diebougou       | 99.2 (98.1–99.8) | 94.8 (91.6–97.2) | 15.9 (11.0–21.7) | 96.8 (91.8–99.5)   | 22.0 (05.7–45.1)     | 93.3 (89.7–96.3) | 04.2 (02.2–07.0) |
|        | Gaoua           | 98.1 (96.6–99.2) | 95.0 (92.1–97.3) | 10.9 (07.3–15.3) | 98.6 (96.0–99.8)   | 41.3 (21.8–62.5)     | 95.4 (92.7–97.5) | 05.4 (03.1–08.4) |
|        | Kampti          | 99.6 (98.6–100)  | 93.9 (87.9–97.6) | 24.4 (14.6–36.5) | 90.0 (72.2–99.1)   | 39.1 (08.6–78.2)     | 88.6 (79.4–94.9) | 03.5 (01.2–07.6) |

**Table S3.** Variables that best characterize each composite readiness profile.

|                                           | v.test | Mean           |         | Standard deviation |         | p-Value |
|-------------------------------------------|--------|----------------|---------|--------------------|---------|---------|
|                                           |        | In the profile | Overall | In the profile     | Overall |         |
| <b>Low Composite Readiness Profile</b>    |        |                |         |                    |         |         |
| Diagnosis by microscopy                   | 6.82   | 0.41           | 0.18    | 0.09               | 0.09    | <0.001  |
| ACT out of stock                          | 2.89   | 0.06           | 0.05    | 0.03               | 0.01    | 0.004   |
| Light source                              | 2.11   | 0.79           | 0.66    | 0.08               | 0.17    | 0.035   |
| Infant weighing scale                     | -2.52  | 0.63           | 0.76    | 0.10               | 0.14    | 0.012   |
| Blood pressure apparatus                  | -2.79  | 0.97           | 0.98    | 0.02               | 0.01    | 0.005   |
| Diagnosis by clinical symptoms            | -3.34  | 0.96           | 0.98    | 0.04               | 0.02    | 0.001   |
| Thermometer                               | -3.62  | 0.98           | 0.99    | 0.03               | 0.01    | <0.001  |
| Artesunate rectal or injectable forms     | -4.15  | 0.18           | 0.39    | 0.06               | 0.14    | <0.001  |
| Rapid diagnostic test availability        | -4.54  | 0.59           | 0.80    | 0.08               | 0.13    | <0.001  |
| Stethoscope                               | -6.37  | 0.95           | 0.98    | 0.03               | 0.01    | <0.001  |
| By rapid diagnostic test                  | -6.93  | 0.75           | 0.93    | 0.12               | 0.07    | <0.001  |
| Staff trained on malaria management       | -7.52  | 0.75           | 0.95    | 0.09               | 0.07    | <0.001  |
| IPTp during pregnancy                     | -7.58  | 0.67           | 0.91    | 0.09               | 0.09    | <0.001  |
| Staff trained for IPT                     | -7.75  | 0.44           | 0.83    | 0.16               | 0.14    | <0.001  |
| First-line antimalarial (ACT)             | -7.78  | 0.53           | 0.92    | 0.13               | 0.14    | <0.001  |
| <b>Medium Composite Readiness Profile</b> |        |                |         |                    |         |         |
| Rapid diagnostic test availability        | -1.98  | 0.75           | 0.80    | 0.13               | 0.13    | 0.047   |
| Diagnosis by microscopy                   | -2.02  | 0.14           | 0.18    | 0.04               | 0.09    | 0.043   |
| Latex gloves for physical exam            | -4.14  | 0.84           | 0.91    | 0.10               | 0.08    | <0.001  |
| Infant weighing scale                     | -4.31  | 0.64           | 0.76    | 0.12               | 0.14    | <0.001  |
| Light source                              | -5.80  | 0.47           | 0.66    | 0.15               | 0.17    | <0.001  |
| <b>High Composite Readiness Profile</b>   |        |                |         |                    |         |         |
| Infant weighing scale                     | 5.53   | 0.83           | 0.76    | 0.10               | 0.14    | <0.001  |
| Rapid diagnostic test availability        | 4.64   | 0.86           | 0.80    | 0.08               | 0.13    | <0.001  |
| Light source                              | 4.03   | 0.73           | 0.66    | 0.11               | 0.17    | <0.001  |
| Latex gloves for physical exam            | 3.97   | 0.94           | 0.91    | 0.05               | 0.08    | <0.001  |
| Staff trained for IPTp                    | 3.22   | 0.88           | 0.83    | 0.02               | 0.14    | 0.001   |
| First-line antimalarial (ACT)             | 3.10   | 0.96           | 0.92    | 0.03               | 0.14    | 0.002   |
| Staff trained on malaria management       | 3.02   | 0.97           | 0.95    | 0.01               | 0.07    | 0.003   |
| IPTp during pregnancy                     | 2.94   | 0.93           | 0.91    | 0.02               | 0.09    | 0.003   |
| Diagnosis by Rapid diagnostic test        | 2.90   | 0.95           | 0.93    | 0.01               | 0.07    | 0.004   |
| Stethoscope                               | 2.56   | 0.99           | 0.98    | 0.00               | 0.01    | 0.010   |
| Artesunate rectal or injectable forms     | 2.10   | 0.41           | 0.39    | 0.13               | 0.14    | 0.036   |
| Diagnosis by microscopy                   | -2.37  | 0.16           | 0.18    | 0.05               | 0.09    | 0.018   |
